# Supplementary material
Source: publisher figshare collection journal article supplement (https://acs.figshare.com/ndownloader/files/3736999)
Supplement: Supplementary file 1 [file 3736999]

## Supporting Information

### Luminescent Polymer Composite Films Containing Coal-Derived Graphene

#### Quantum Dots

Anton Kovalchuk,<sup>‡</sup> Kewei Huang,<sup>‡</sup> Changsheng Xiang,<sup>‡</sup> Angel A. Martí,<sup>‡</sup> James M. Tour<sup>‡,1,†\*</sup>

<sup>‡</sup>Department of Chemistry, <sup>1</sup>Department of Materials Science and NanoEngineering, <sup>†</sup>Smalley

Institute for Nanoscale Science and Technology, Rice University, 6100 Main Street, Houston,

Texas 77005, USA.

Correspondence and requests for materials should be addressed to J.M.T. (email:

[tour@rice.edu](mailto:tour@rice.edu)).

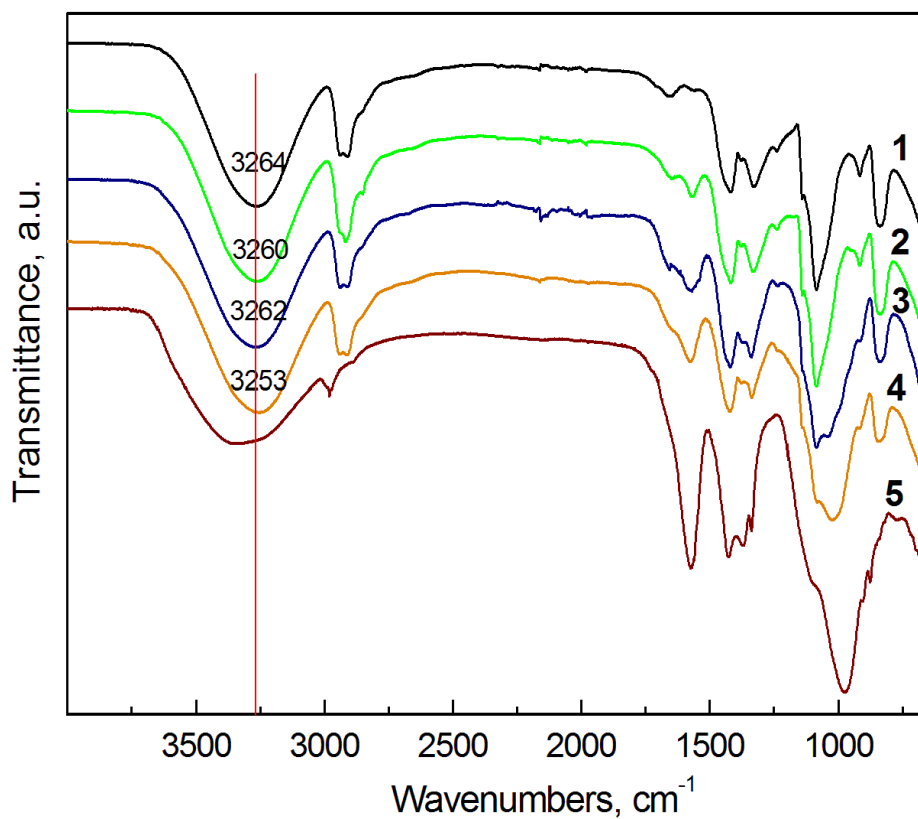

**Figure S1.** FT-IR spectra for the (1) neat PVA; PVA/GQD nanocomposites with (2) 3 wt%; (3) 15 wt%; and (4) 20 wt% GQD content; and (5) GQDs

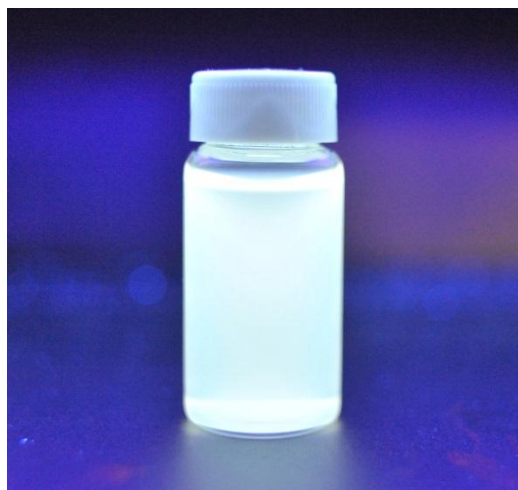

**Figure S2.** Photograph demonstrating fluorescence emitted by a dilute aqueous solution of GQDs (0.125 mg/mL) under UV light

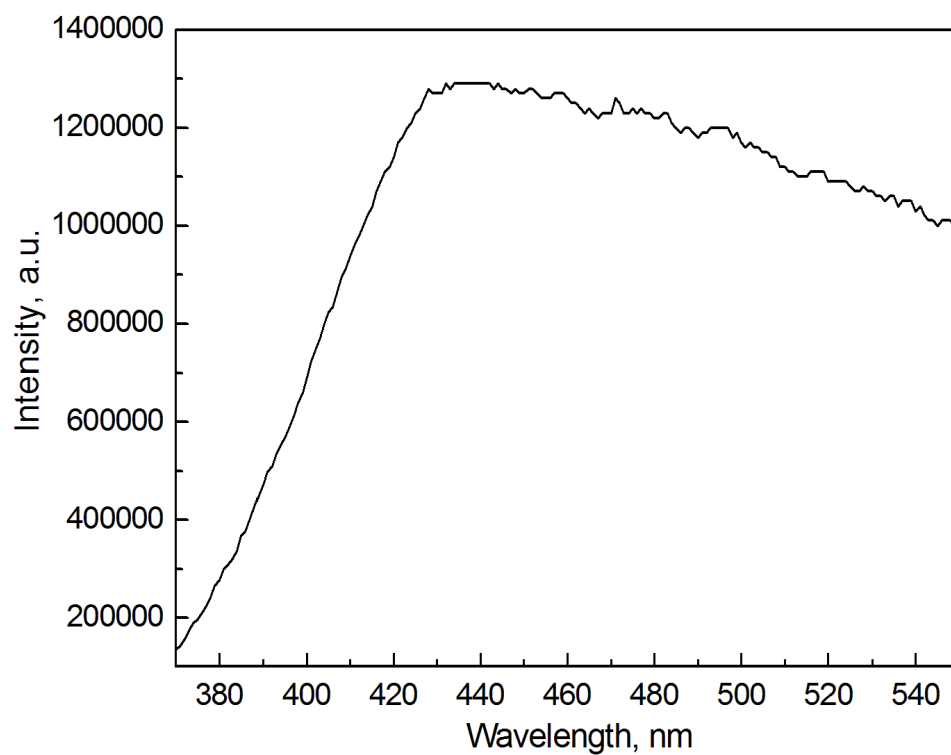

**Figure S3.** Photoluminescence spectrum of a dilute aqueous solution of GQDs (0.125 mg/mL)

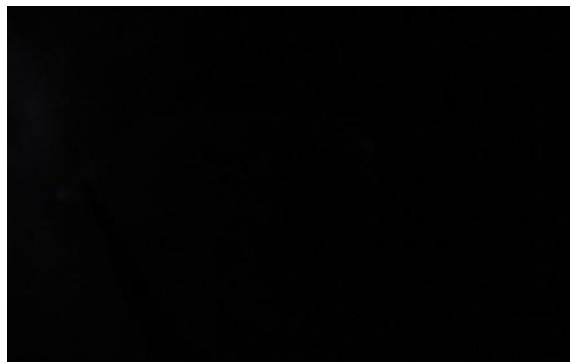

**Figure S4.** Photograph showing PVA/5 wt% GQD film in a dark room without UV illumination.

Nothing can be seen.
